# Supplementary material for: Discrimination of mongoose hair from domestic cattle hair, human hair, and synthetic fiber using FTIR spectroscopy and chemometric analysis: a rapid, cost-effective, and field-deployable tool for wildlife forensics
Source: Royal Society of Chemistry journal article supplement (doi:10.1039/d4ra06981a), 2024-01-01
Supplement: d4ra06981a1.pdf [file d4ra06981a1.pdf]

**Discrimination of mongoose hair from domestic cattle, human hair, and synthetic fiber using FTIR spectroscopy and chemometric analysis: A rapid, cost-effective, and field-deployable tool for wildlife forensics**

Shinta Ann Jose<sup>1</sup>, Kalaiyaran Boopathy Thiyagarajan<sup>1\*</sup>, Chanthini Baskar<sup>2</sup>, Rajinder Singh<sup>3</sup>, A. Udhayan<sup>1</sup>

<sup>1</sup>Advanced Institute for Wildlife Conservation, Tamil Nadu Forest Department, Vandalur, Chennai, Tamil Nadu, India, 600 048, India.

<sup>2</sup>School of Electronics Engineering, Vellore Institute of Technology, Chennai 600 127, India.

<sup>3</sup>Department of Forensic Science, Punjabi University, Patiala -147 002, India.

**Address for correspondence\***

Dr. Kalaiyaran, Ph.D.  
Project Scientist  
Advanced Institute for Wildlife Conservation  
Tamil Nadu Forest Department  
Vandalur, Chennai - 600 048  
Email: [t.biokalai@gmail.com](mailto:t.biokalai@gmail.com)

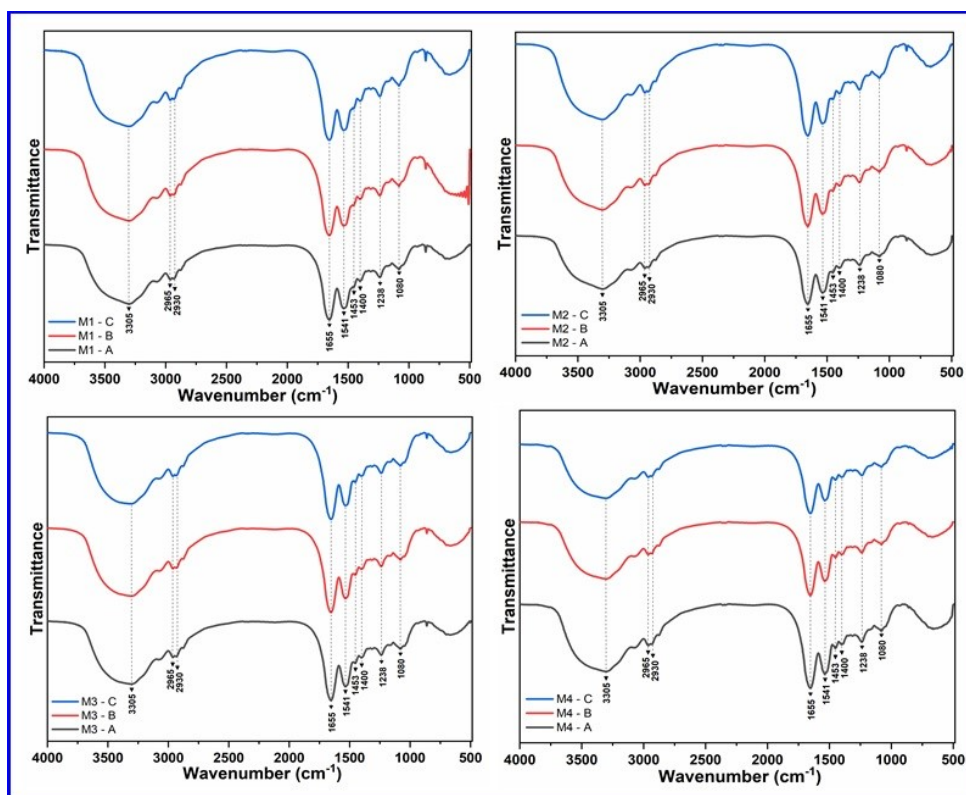

**Supplementary Figure 1.** FTIR spectroscopy analysis of hair samples from Indian grey mongoose (*Herpestes edwardsii*); M1-M4, Four individuals of Indian grey mongoose.

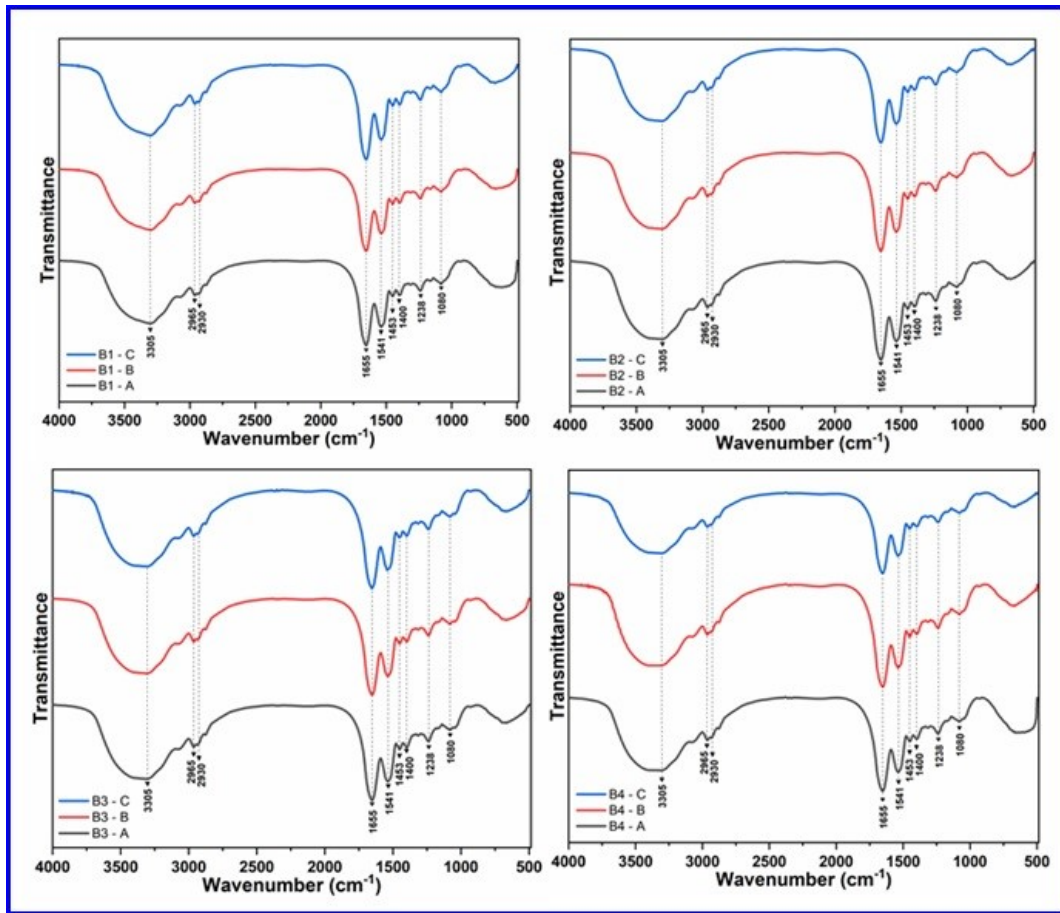

**Supplementary Figure 2.** FTIR spectroscopy analysis of hair from domestic water buffalo (*Bubalus bubalis*); B1-B4, Four individuals of domestic water buffalo.

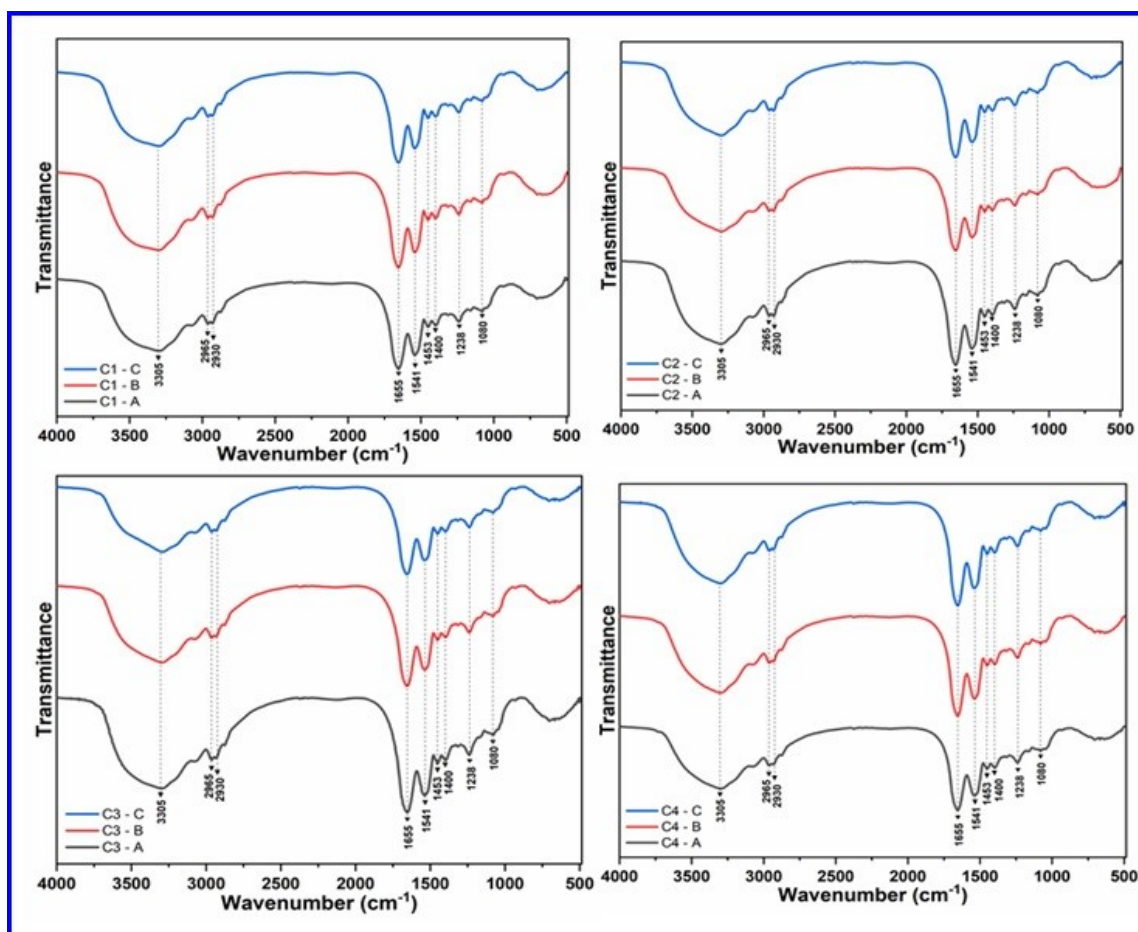

**Supplementary Figure 3.** FTIR spectroscopy analysis of hair from domestic cow (*Bos taurus indicus*); C1-C4, Four individuals of domestic cow.

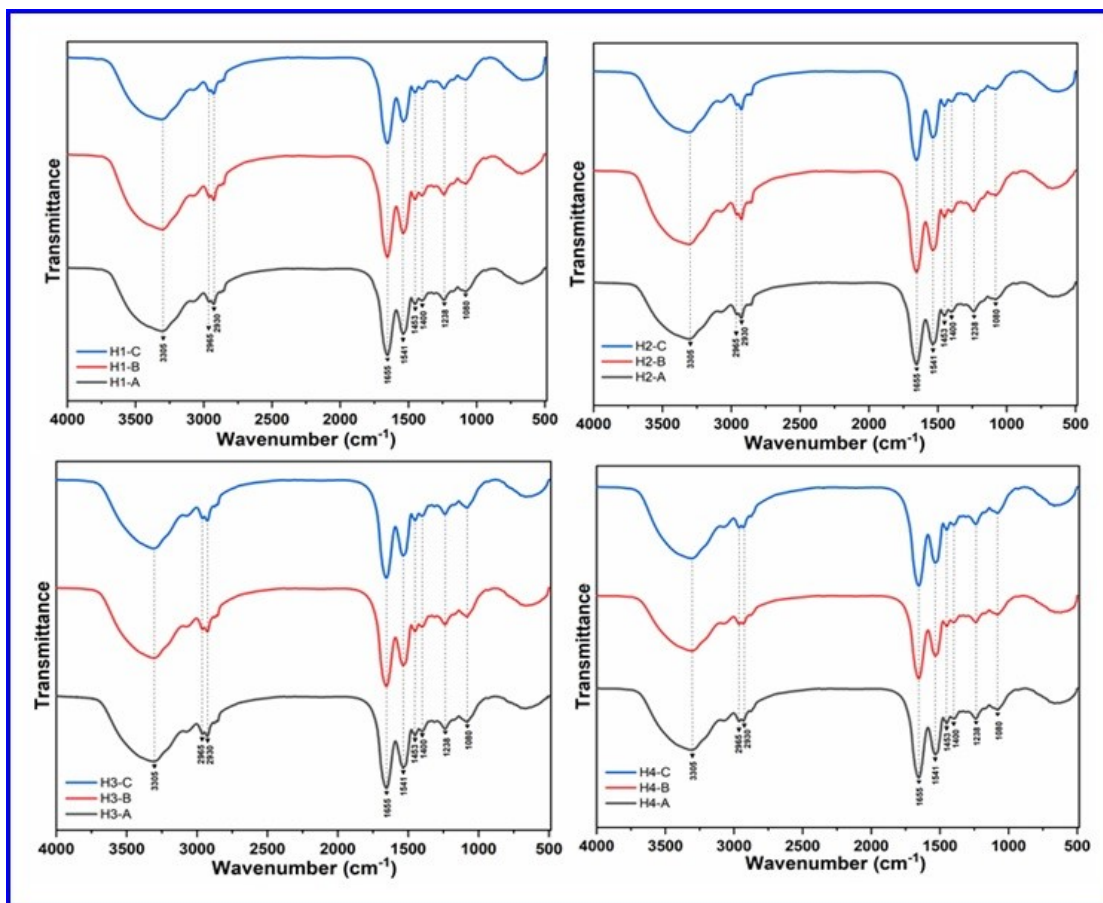

**Supplementary Figure 4.** FTIR spectroscopy analysis of hair from human; H1-H4, Four individuals of humans.
